# Supplementary material
Source: PubMed Central journal article supplement (PMC4381425)
Supplement: NIHMS651213-supplement.pdf [file NIHMS651213-supplement.pdf]

# Supplemental Figure 1

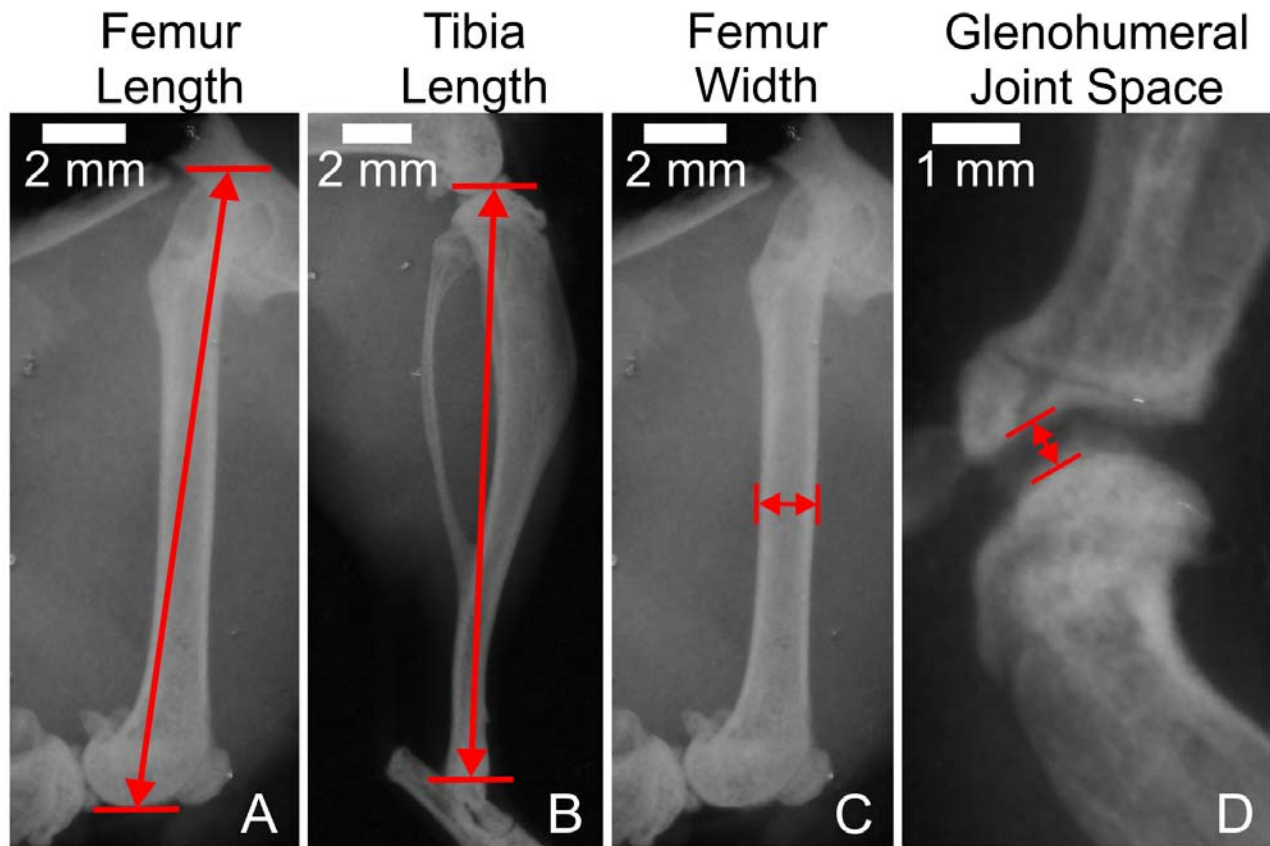

**Supplemental Fig 1. Method of measurements.** Examples of measurements of the femur, tibia, and joint space. The red lines indicate the region measured, while the perpendicular lines show the edge of the measured region. Panels A-C display the leg of a normal mouse, while panel D is the arm of a purebred *Gusb*<sup>-/-</sup> mouse. **A.** Femur length was taken by measuring from the outermost edge of the proximal femur to the outermost curve of the distal femur. **B.** Tibia lengths were obtained by measuring from the proximal end to the outermost edge of the distal end where the tibia meets the tarsals. **C.** Femur widths were obtained by measuring across the approximate middle of each femur. **D.** Joint space was measured between the glenoid cavity and the humerus at a point one third of the length of the glenoid cavity from the lateral edge.

## Supplemental Figure 2

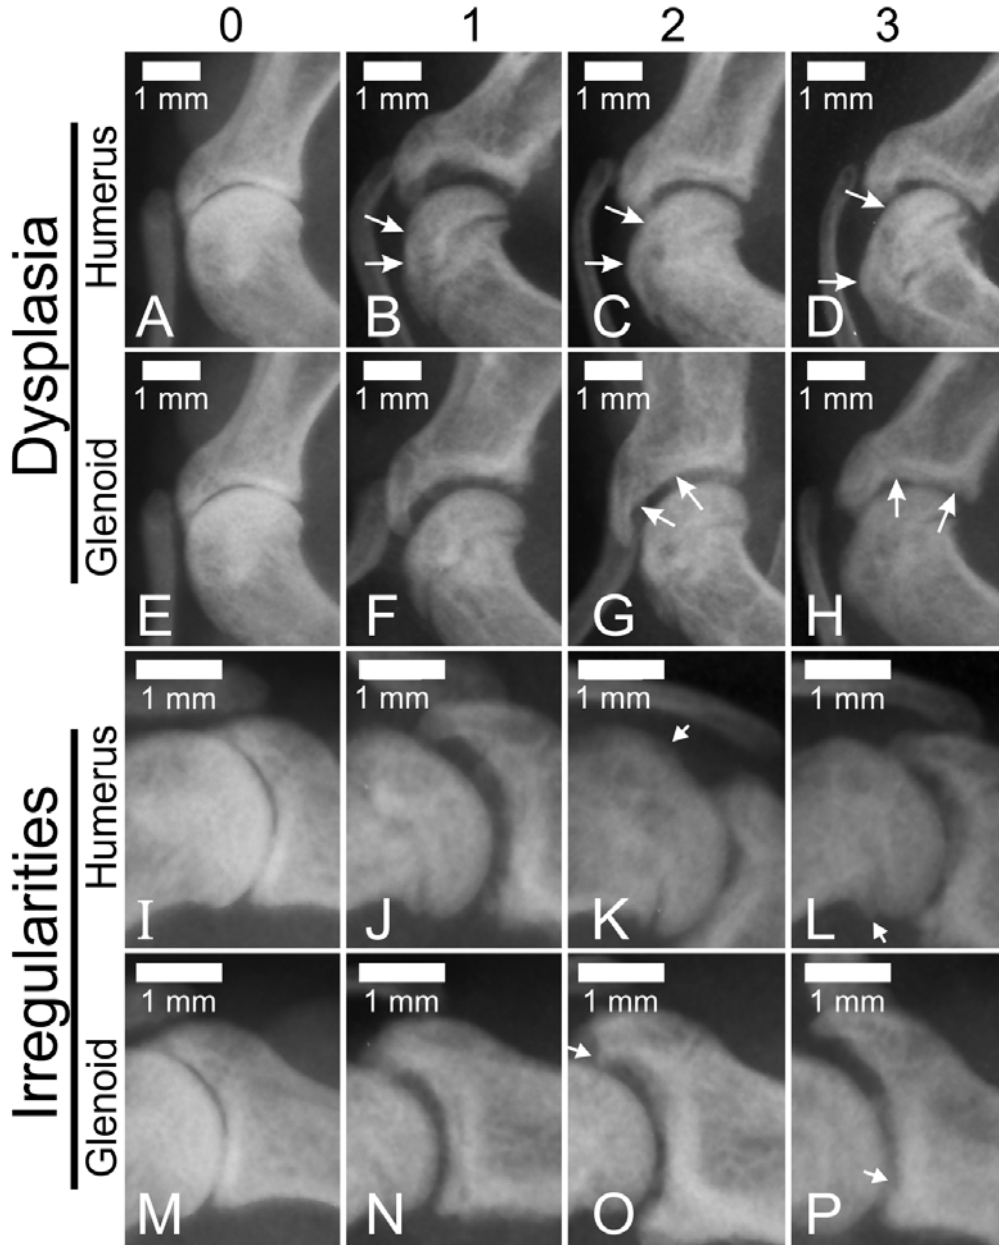

**Supplemental Fig 2. Scoring of the glenohumeral joint.** Examples of male mice at 3 months of age are shown for each score from +0 (normal) to +3 (severely abnormal) for dysplasia and irregularities of the humerus and the glenoid cavity. For panels B-D and G-H, the long white arrows indicate the edges of a region that is considered to be flattened, a measure of dysplasia. For panels K-L and O-P, the short white arrows indicate regions of articular bone that were irregular at the surface. The region identified in panel O is likely an osteophyte.

### Supplemental Figure 3

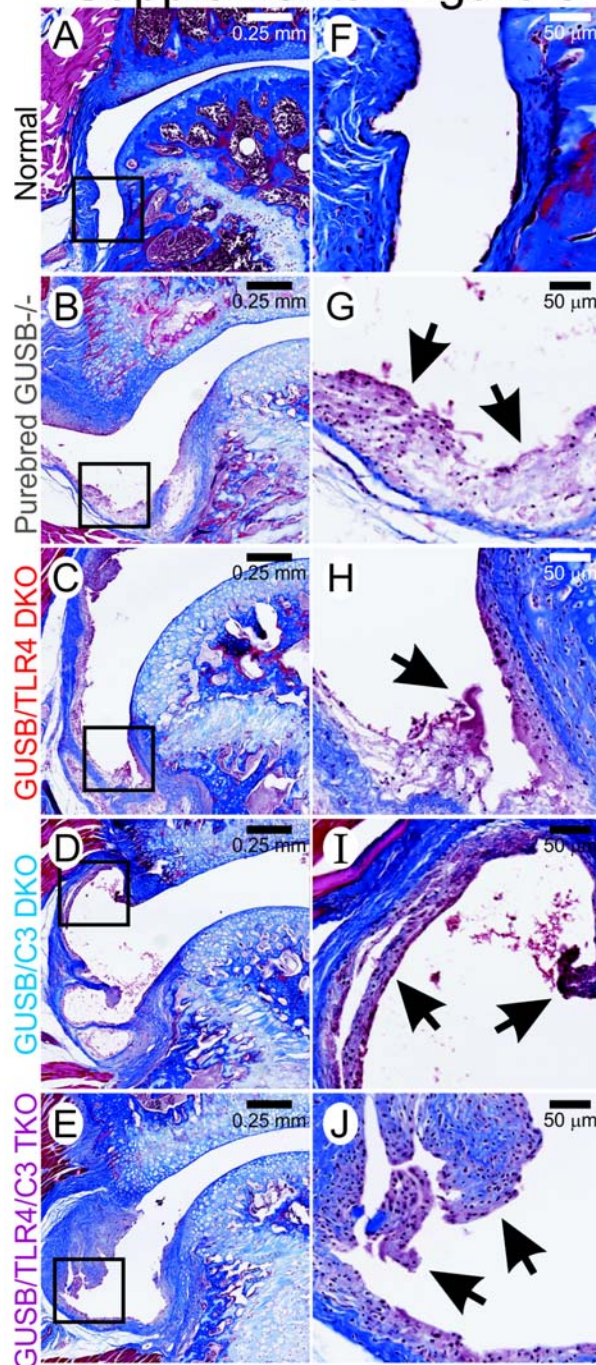

**Supplemental Fig 3.** Synovial hyperplasia in the subcondylar neck region. Examples of synovium tissue in the condylar neck region of the glenohumeral joint in male mice at 3 months. Genotypes are indicated to the left. **A-E.** These images were obtained at low power magnification, and the boxes indicate the region that is magnified in the panels on the right. **F-J.** These images were obtained at high power magnification, and the black arrows indicate synovial hyperplasia in the *Gusb*<sup>-/-</sup> mice.
